# Supplementary material for: Hyperglycemic Conditions Promote Rac1-Mediated Serine536 Phosphorylation of p65 Subunit of NFκB (RelA) in Pancreatic Beta Cells
Source: PubMed Central journal article supplement — Cell Physiol Biochem. Author manuscript; Available in PMC 2022 Nov 9. (PMC9644397; doi:10.33594/000000557), 2022-08-19
Supplement: NIHMS1844748-supplement-Supplementary_Table_1.pdf [file NIHMS1844748-supplement-Supplementary_Table_1.pdf]

## **Supplementary Material**

# **Hyperglycemic Conditions Promote Rac1-Mediated Serine536 Phosphorylation of p65 Subunit of NFκB (RelA) in Pancreatic Beta Cells**

Anjaneyulu Kowluru<sup>a,b</sup> Suhadinie Gamage<sup>a,b</sup> Mirabela Hali<sup>a,b</sup> Noah Gleason<sup>a,b</sup>

<sup>a</sup>Biomedical Research Service, John D. Dingell VA Medical Center, Detroit, MI, USA, <sup>b</sup>Department of Pharmaceutical Sciences, Eugene Applebaum College of Pharmacy and Health Sciences, Wayne State University, Detroit, MI, USA

**Supplementary Table S1: Small molecule inhibitors used in the current investigation**

| <b>Inhibitor Used</b> | <b>Modes of action</b>                                                                                                                                                                                         |
|-----------------------|----------------------------------------------------------------------------------------------------------------------------------------------------------------------------------------------------------------|
| Simvastatin           | Inhibits HMG CoA reductase thereby depleting intracellular pools of cholesterol biosynthetic pathway intermediates, and prenyl pyrophosphates, such as farnesyl and geranylgeranyl pyrophosphates [36, 38, 39] |
| L-788,123             | Inhibits farnesyl and geranylgeranyl transferases [40, 41]                                                                                                                                                     |
| NSC23766              | Inhibits Tiam1-mediated activation of Rac1 [44, 48]                                                                                                                                                            |
| Ehop-016              | Inhibits Vav2-mediated activation of Rac1 [44, 48, 75]                                                                                                                                                         |
| EHT-1864              | Inhibits guanine nucleotide binding and activation of Rac1 [35, 56, 73]                                                                                                                                        |
